# Supplementary material
Source: MDPI journal article supplement (https://www.mdpi.com/2306-5710/9/4/93)
Supplement: s1 [file s1]

# Supplementary Materials

## Volatile Compounds Chromatograms of Rye-Barley beers

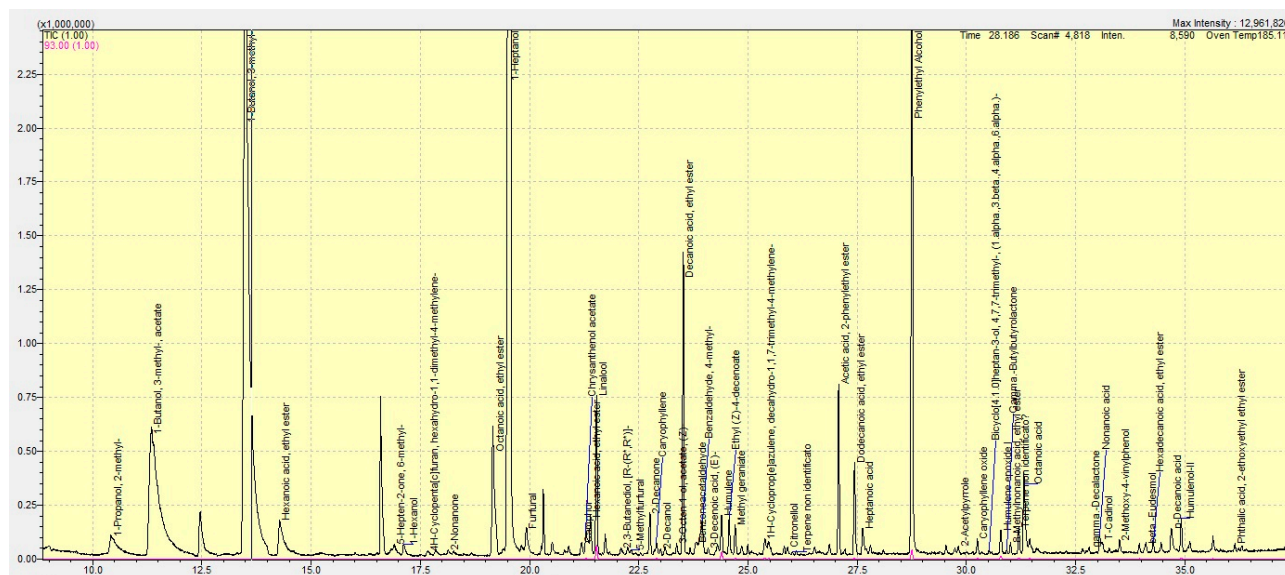

Figure S 1 -- Total ion chromatogram of Rye-Barley beers used as quality control
