# Supplementary material
Source: MDPI journal article supplement (https://www.mdpi.com/2306-5710/9/4/93)
Supplement: s1 [file s1]

Archive with 1 entries (1 files):
- beverages-2622865-supplementary.pdf
